# Supplementary material for: Doxorubicin–Loaded Human Serum Albumin Submicron Particles: Preparation, Characterization and In Vitro Cellular Uptake
Source: MDPI journal article supplement (doi:10.3390/pharmaceutics12030224), 2020-03-02
Supplement: s1 [file s1]

# Supplementary Materials: Doxorubicin–Loaded Human Serum Albumin Submicron Particles: Preparation, Characterization and In Vitro Cellular Uptake

Saranya Chaiwaree, Ausanai Prapan, Nittiya Suwannasom, Tomás Laporte, Tanja Neumann, Axel Pruß, Radostina Georgieva and Hans Bäumler

## HSA-MP in PBS

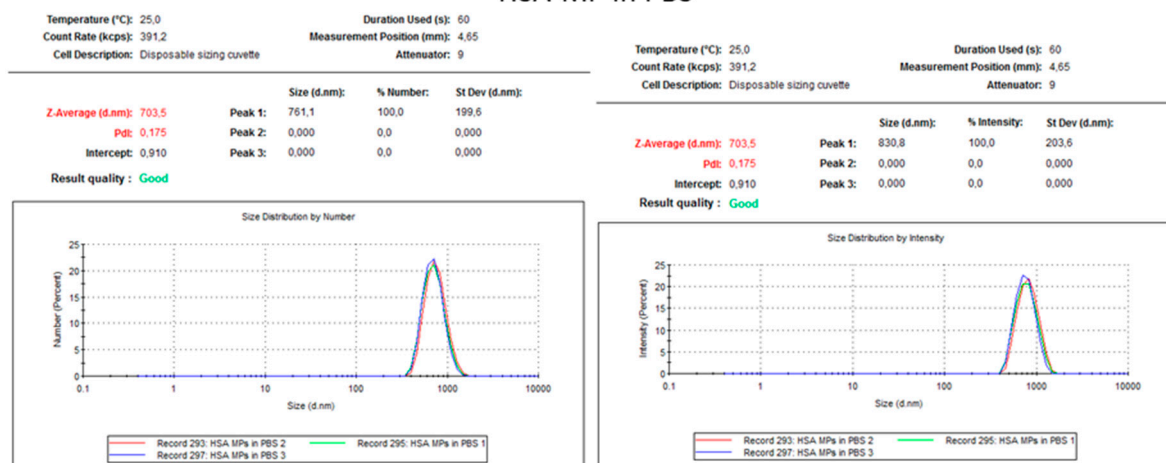

## DOX-HSA-MPs in PBS

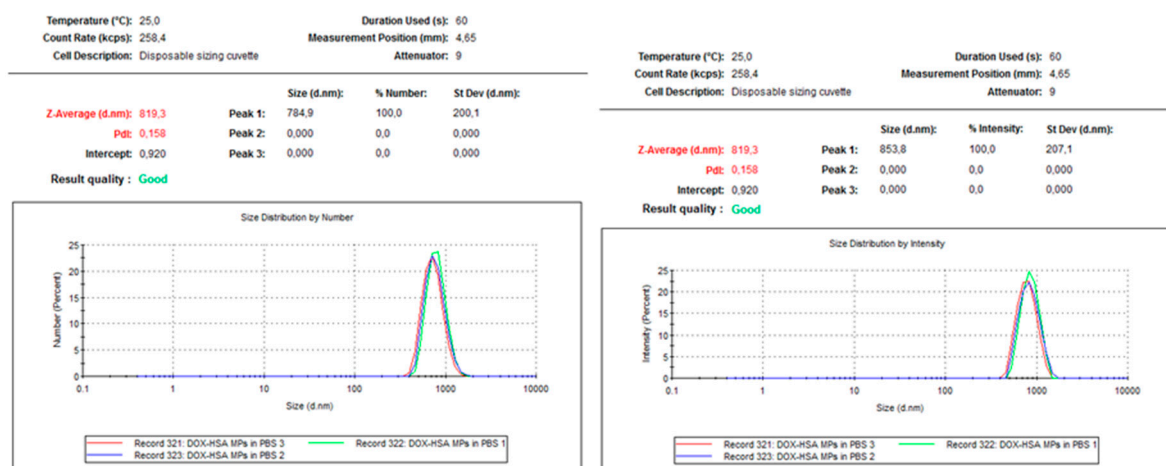

**Figure S1.** Size distribution of HSA-MP and DOX-HSA-MP shown by numbers and by intensity. No statistically significant differences of the hydrodynamic diameter of both particle types were found. In addition, the results demonstrated a low polydispersity index, indicating narrow size distribution of the particle population and no aggregation of particles.

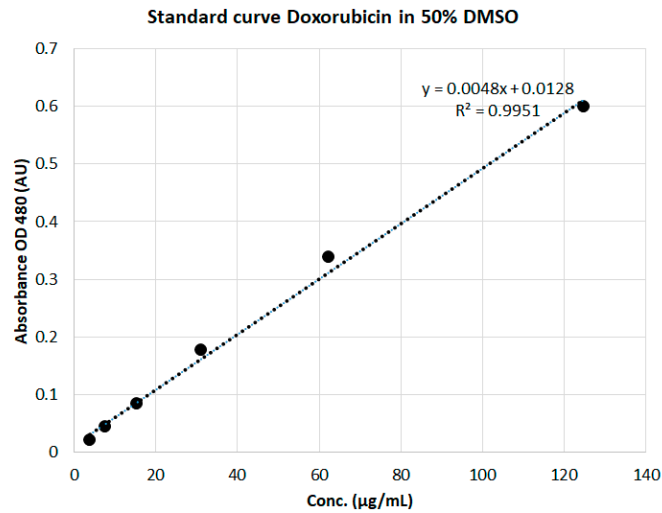

**Figure S2.** Calibration curve for Doxorubicin dissolved in 50% DMSO.

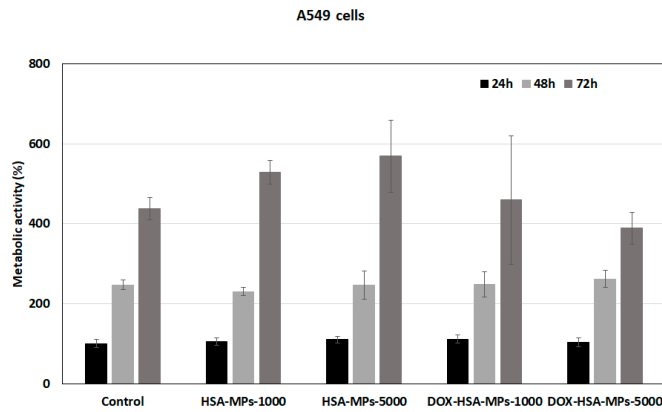

**Figure S3.** The cytotoxicity of HSA-MPs and DOX-HSA-MPs was examined by determining their effects on the mitochondrial metabolic activity of the cells after 24, 48, and 72 h exposure. At the lower particle concentrations (1000 and 5000 particles per cell), no significant differences between the metabolic activity of the cells cultured with both types of particles and that of the untreated cells were found.

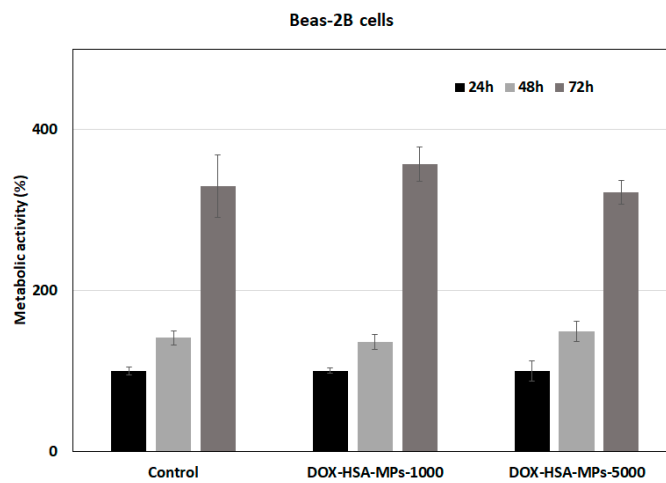

**Figure S4.** In parallel, the DOX-HSA-MPs were also cultured with the non-cancerous cell line BEAS-2B derived from normal human bronchial epithelium. Here, also 1000, 5000 and 10,000 particles were added per seeded cell. The CCK-8 assay resulted in no significant differences between the cells cultured with DOX-HSA-MPs and untreated cells.
